# Supplementary material
Source: PubMed Central journal article supplement (PMC4800817)

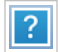

Supplement: NIHMS717567-supplement-Supplementary.pdf [file NIHMS717567-supplement-Supplementary.pdf]
